# Supplementary material for: Chromatin Insulator Factors Involved in Long-Range DNA Interactions and Their Role in the Folding of the Drosophila Genome
Source: PubMed Central journal article supplement (PMC4148193; doi:10.1371/journal.pgen.1004544), 2014-08-28

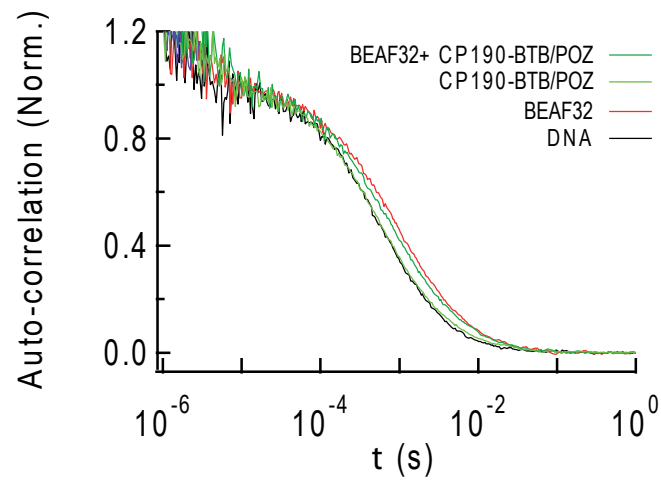

Supplement: pgen.1004544.s007.pdf [file pgen.1004544.s007.pdf]
