# Supplementary material for: Chromatin Insulator Factors Involved in Long-Range DNA Interactions and Their Role in the Folding of the Drosophila Genome
Source: PubMed Central journal article supplement (PMC4148193; doi:10.1371/journal.pgen.1004544), 2014-08-28
Supplement: pgen.1004544.s008.pdf [file pgen.1004544.s008.pdf]

## Crystallographic structure of CP190-BTB/POZ

**Supplementary Table 1.** Data collection and refinement statistics of the CP190-BTB/POZ crystal structure.

### Data collection

|                             |                             |
|-----------------------------|-----------------------------|
| Space group                 | $P3_221$                    |
| <i>Cell dimensions</i>      |                             |
| $a, b, c$ (Å)               | 84.98, 84.98, 40.87         |
| $\alpha, \beta, \gamma$ (°) | 90, 90, 120                 |
| Resolution, (Å)             | 42.49 – 2.03 (2.14 – 2.03)* |
| $R_{merge}$ %               | 5.4 (51.6)                  |
| Mean( $I$ )/ $\sigma I$     | 16.6 (3.1)                  |
| Completeness %              | 100. (100.)                 |
| Redundancy                  | 6.9 (7.1)                   |

### Refinement

|                                 |              |
|---------------------------------|--------------|
| Resolution (Å)                  | 2.03         |
| No of reflections               | 77479        |
| No unique reflections           | 11252        |
| $R/R_{free}$                    | 19.1/24.1    |
| $B_{factors}$ (Å <sup>2</sup> ) |              |
| protein                         | 60.6         |
| waters                          | 63.8         |
| solvent                         | 63.9         |
| Rmsd bond lengths (Å)           | 0.007        |
| Rmsd bond angles °              | 1.037        |
| Ramachandran plot (%)           | 98.3/1.7/0.0 |
| (favoured/allowed/disallowed)   |              |

\* the values in parenthesis are for the highest-resolution shell.
