# Supplementary material for: Chromatin Insulator Factors Involved in Long-Range DNA Interactions and Their Role in the Folding of the Drosophila Genome
Source: PubMed Central journal article supplement (PMC4148193; doi:10.1371/journal.pgen.1004544), 2014-08-28
Supplement: pgen.1004544.s009.pdf [file pgen.1004544.s009.pdf]

**Supplementary Table 2.** Constructs for protein expression and EMSA. BEAF32, CP190, CP190-C, Chromator, Chromator-C were amplified from *Drosophila* genomic S2 cDNA.

| <b>plasmid</b>        | <b>description</b>                        | <b>reference</b>             |
|-----------------------|-------------------------------------------|------------------------------|
| pTST101               | E. coli expression vector, bla, malE-egfp | J. Altenbuchner, pers. comm. |
| pTST101-BEAF-6His     | E. coli expression vector, bla, malE-egfp | This study                   |
| pTST101-447pos        | E. coli expression vector, bla, malE-egfp | This study                   |
| pDONR221              | Gateway entry vector                      | Invitrogen                   |
| pDONR221- CP190       | Gateway entry vector                      | This study                   |
| pDONR221- CP190-C     | Gateway entry vector                      | This study                   |
| pDONR221- chromator   | Gateway entry vector                      | This study                   |
| pDONR221- chromator-C | Gateway entry vector                      | This study                   |
| pDEST300              | Gateway expression vector                 | Invitrogen                   |
| pDEST300-CP190        | Gateway expression vector                 | This study                   |
| pDEST300-CP190-C      | Gateway expression vector                 | This study                   |
| pDEST300-chromator    | Gateway expression vector                 | This study                   |
| pDEST300-chromator-C  | Gateway expression vector                 | This study                   |
