# Supplementary material for: Chromatin Insulator Factors Involved in Long-Range DNA Interactions and Their Role in the Folding of the Drosophila Genome
Source: PubMed Central journal article supplement (PMC4148193; doi:10.1371/journal.pgen.1004544), 2014-08-28
Supplement: pgen.1004544.s010.pdf [file pgen.1004544.s010.pdf]

**Supplementary Table 3.** Oligonucleotides used for the construction of expression vectors.

(Sequences are given 5' → 3')

| <b>name</b>          | <b>sequence</b>                                                                |
|----------------------|--------------------------------------------------------------------------------|
| oh-BglII TEVBEAFFw   | AGCGCGAGATCTGAAAACCTGTATTTTCAGGGAATGCC                                         |
| oh-HindBEAFRev       | GGCCGCAAGCTTCAGTGATGATGATGATGATGTCCCTGAAAATACAGG<br>T                          |
| TEVBEAFFw            | TATTTTCAGGGAATGCCCAAGGGTCGTGTTA                                                |
| TEVBEAFRev           | CTGAAAATACAGGTTTTCTCATCCTTGCAAGCGT                                             |
| ChromatorattB1TEFW   | GGGACAAGTTTGTACAAAAAAGCAGGCTTCGAAAACCTGTATTTTCA<br>GGGCATGTTGGCACAGGAGATTTACC  |
| ChromatorattB2Rev    | GGGACCACTTTGTACAAGAAAGCTGGGTGTTACGTTGGGATGTTGA<br>GCGTCTTA                     |
| CP190attB1 Fw        | GGGACAAGTTTGTACAAAAAAGCAGGCTTCGAAAACCTGTATTTTCA<br>GGGCATGGGTGAAGTCAAGTCCGTG   |
| CP190attB2Rev        | GGGACCACTTTGTACAAGAAAGCTGGGTGTTATAGCTCCTCCTTCGC<br>CGCCG                       |
| chrom-C-601-926attB1 | GGGACAAGTTTGTACAAAAAAGCAGGCTTCGAAAACCTGTATTTTCA<br>GGGCGGAACCTCCGCAACATCGCCAAC |
| chrom-C-attB1        | GGGACAAGTTTGTACAAAAAAGCAGGCTTCATCGATGAAACGGACG<br>AAG                          |
