# Supplementary material for: Chromatin Insulator Factors Involved in Long-Range DNA Interactions and Their Role in the Folding of the Drosophila Genome
Source: PubMed Central journal article supplement (PMC4148193; doi:10.1371/journal.pgen.1004544), 2014-08-28
Supplement: pgen.1004544.s011.pdf [file pgen.1004544.s011.pdf]

**Supplementary Table 4.** Oligonucleotides for the construction for pTST-447pos

| <b>name</b>        | <b>sequence</b>                   |
|--------------------|-----------------------------------|
| ohbgIIICGATAFw     | AGCGCGAGATCTTGACACTGCTAGCTAGAGC   |
| oh-HindIIICGATARev | GGCCGCAAGCTTGGAAATCACGTAACATTGCCG |
