# Supplementary material for: Chromatin Insulator Factors Involved in Long-Range DNA Interactions and Their Role in the Folding of the Drosophila Genome
Source: PubMed Central journal article supplement (PMC4148193; doi:10.1371/journal.pgen.1004544), 2014-08-28
Supplement: pgen.1004544.s012.pdf [file pgen.1004544.s012.pdf]

**Supplementary Table 5.** 5'labelled oligonucleotides used for anisotropy and FCCS measurements.

| <b>name</b>                      | <b>sequence</b>                                                |
|----------------------------------|----------------------------------------------------------------|
| cy3B-DNA <sub>S</sub> - Fw       | AGAAGTCAGCGCGATAGCATCGATATTTTCGTGACACGCTTG<br>TCATCCGATAGGTAGT |
| atto655 -DNA <sub>S</sub> - Fw   | AGAAGTCAGCGCGATAGCATCGATATTTTCGTGACACGCTTG<br>TCATCCGATAGGTAGT |
| unlabeled DNA <sub>S</sub> - Rev | ACTACCTATCGGATGACAAGCGTGTACGAAAATATCGATGCT<br>ATCGCGCTGACTTCT  |
| cy3-DNA <sub>NS</sub> -Fw        | GGACAGGTATTGTGCCATACTGACCACATCGTCTTGGTCTATA<br>AGCTCCACGACATCC |
| unlabeled DNA <sub>NS</sub> -Rev | GGATGTCGTGGAGCTTATAGACCAAGACGATGTGGTCAGTAT<br>GGCACAATACCTGTCC |
