# Supplementary material for: Chromatin Insulator Factors Involved in Long-Range DNA Interactions and Their Role in the Folding of the Drosophila Genome
Source: PubMed Central journal article supplement (PMC4148193; doi:10.1371/journal.pgen.1004544), 2014-08-28
Supplement: pgen.1004544.s013.pdf [file pgen.1004544.s013.pdf]

**Supplementary Table 6.** Tracks used for Figure 1C

| <b>Protein</b> | <b>Track description</b>                                                                                                                |
|----------------|-----------------------------------------------------------------------------------------------------------------------------------------|
| BEAF           | BEAF-HB antibody, S2-DRSC, filename:<br>GSM520782_364.Mvalues.bigWig<br>Cell Line S2-DRSC;Antibody BEAF-HB extraction3_array1           |
| Chromator      | Chro(Chriz)WR antibody, S2-DRSC,<br>filename:GSM520800_71.Mvalues.bigWig<br>Cell Line S2-DRSC;Antibody Chro(Chriz)WR extraction1_array1 |
| CP190          | Cell Line S2-DRSC;Antibody CP190-VC extraction1_array1<br>CP190-VC antibody, S2-DRSC,<br>filename:GSM520804_403.Mvalues.bigWig          |
| CTCF           | Cell Line S2-DRSC;Antibody CTCF-VC extraction1_array1<br>CTCF-VC antibody, S2-DRSC,<br>filename:GSM520812_409.Mvalues.bigWig            |
| Su(HW)         | Cell Line S2-DRSC;Antibody Su(Hw)-VC extraction3_array1<br>Su(Hw)-VC antibody, S2-DRSC, filename:<br>GSM520985_374.Mvalues.bigWig       |
